# Supplementary material for: An anomalous downsizing of glycothermally-synthesized YBO3 crystals by Ce3+ doping
Source: Royal Society of Chemistry journal article supplement (doi:10.1039/c3ce41813h), 2013-01-01
Supplement: c3ce41813h.pdf [file c3ce41813h.pdf]

## Electronic supplementary information (ESI)

# An anomalous downsizing of glycothermally-synthesized YBO<sub>3</sub> crystals by Ce<sup>3+</sup> doping

Ayano Tani, Hiroki Hara, Satoru Takeshita,\* and Tetsuhiko Isobe\*

Department of Applied Chemistry, Faculty of Science and Technology, Keio University, 3-14-1 Hiyoshi, Kohoku-ku, Yokohama 223-8522, Japan

### Additional figures

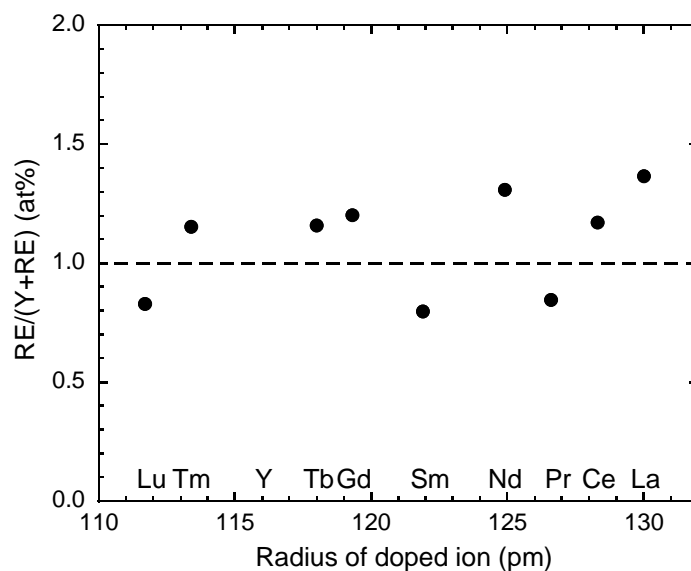

**Fig. S1.** Change in the actual RE concentration of RE<sup>3+</sup>-doped YBO<sub>3</sub> samples with ionic radius of doped RE<sup>3+</sup> ion.

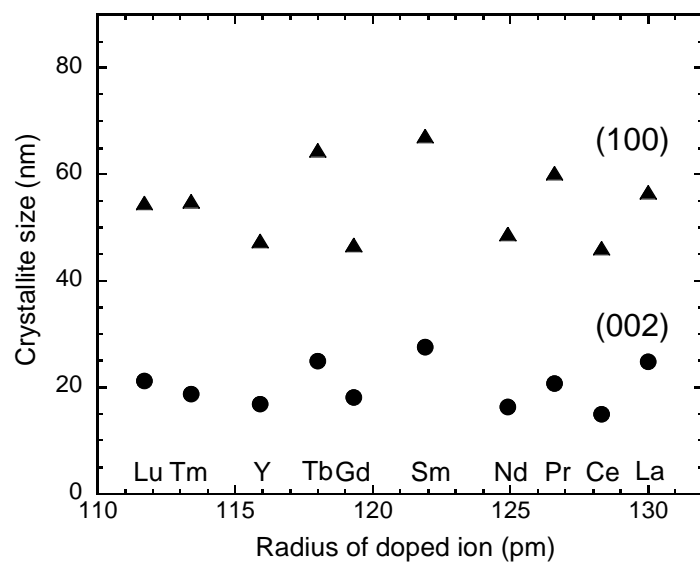

**Fig. S2.** Changes in crystallite sizes perpendicular to (100) and (002) of  $\text{RE}^{3+}$ -doped  $\text{YBO}_3$  samples with ionic radius of doped  $\text{RE}^{3+}$  ion.

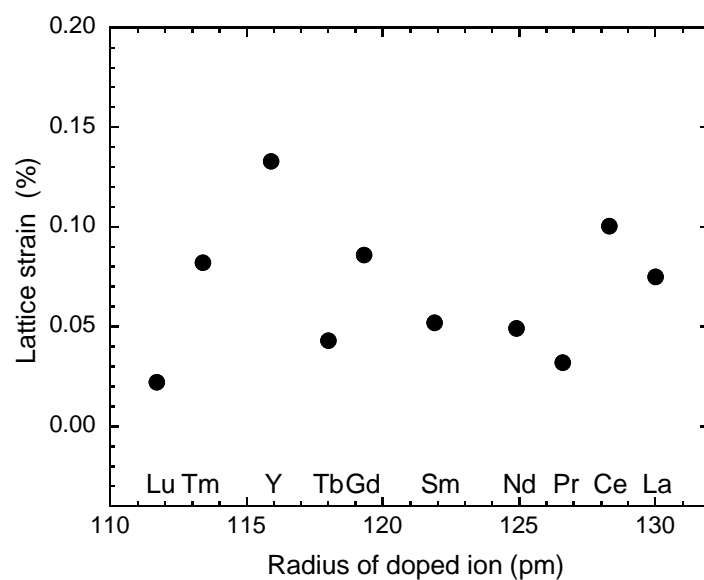

**Fig. S3.** Change in the lattice strain along  $a$ -direction of  $\text{RE}^{3+}$ -doped  $\text{YBO}_3$  samples with ionic radius of doped  $\text{RE}^{3+}$  ion.

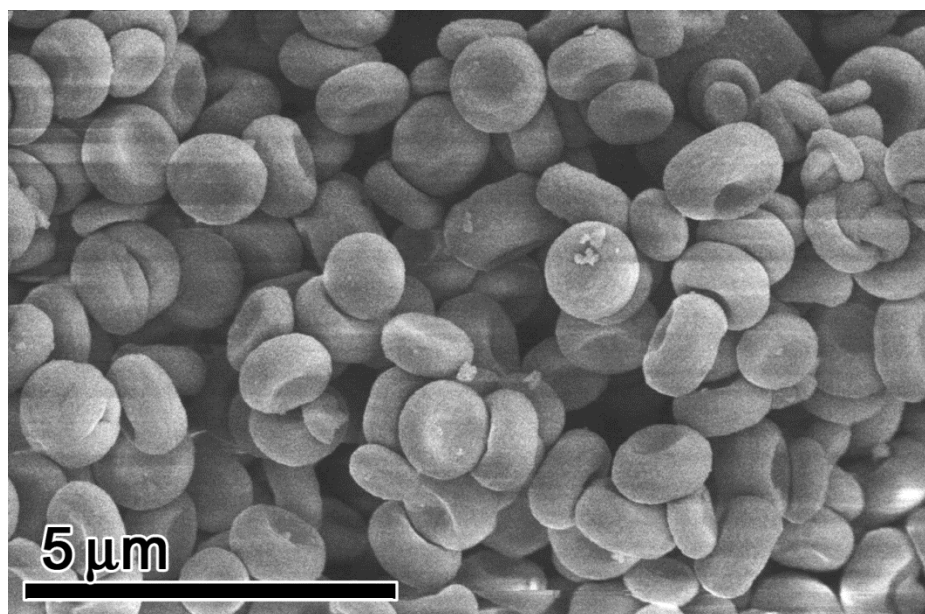

**Fig. S4.** SEM image of the undoped YBO<sub>3</sub> sample.

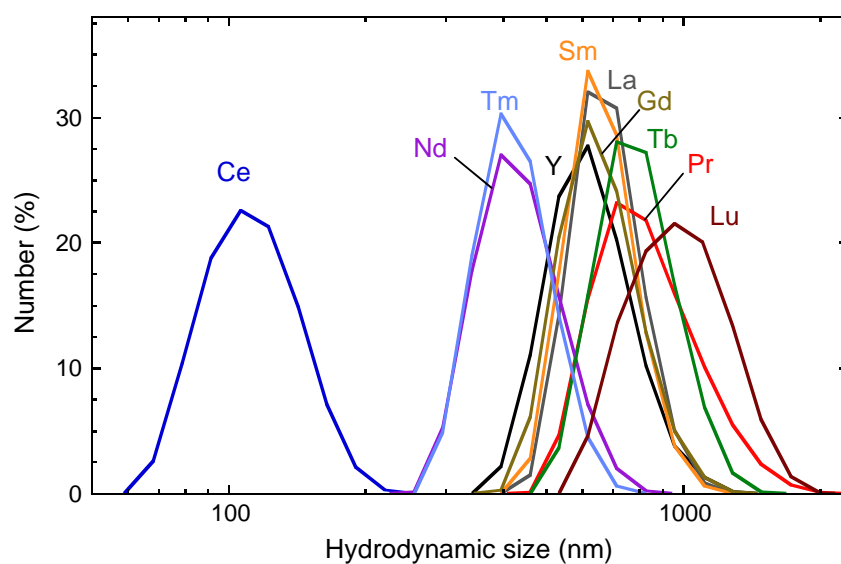

**Fig. S5.** Hydrodynamic size distributions of RE<sup>3+</sup>-doped YBO<sub>3</sub> samples.

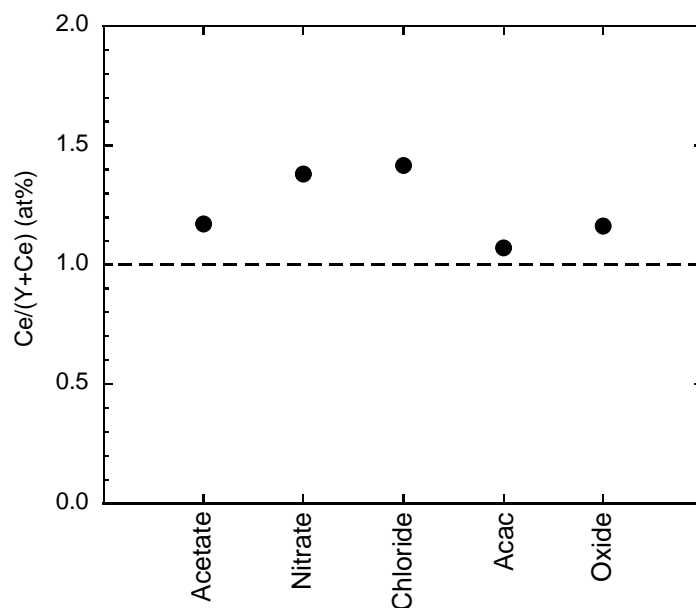

**Fig. S6.** Actual cerium concentrations of Ce-doped YBO<sub>3</sub> samples prepared from different cerium sources.

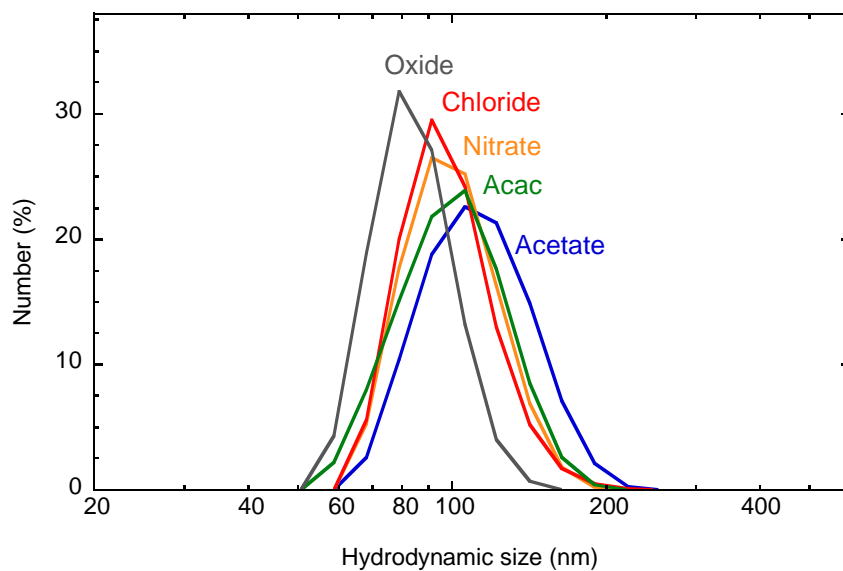

**Fig. S7.** Hydrodynamic size distributions of Ce-doped YBO<sub>3</sub> samples prepared from different cerium sources.
